# Supplementary material
Source: Springer Nature journal article supplement (https://www.springermedizin.de/resource/supplementary/12936_2012_2599_MOESM13_ESM.pdf/9542970)
Supplement: MOESM13 [file 9542970]

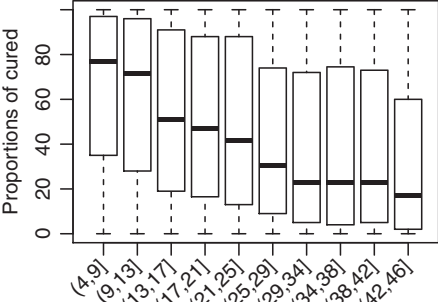

ART EC<sub>50</sub> concentration (ng/mL) deciles

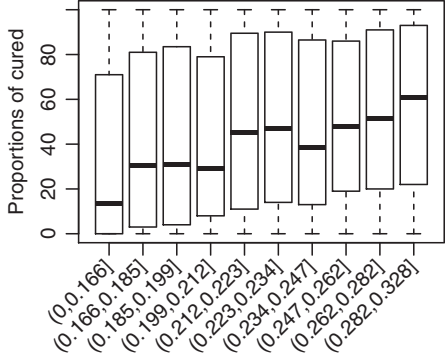

ART  $k_{max}$  deciles

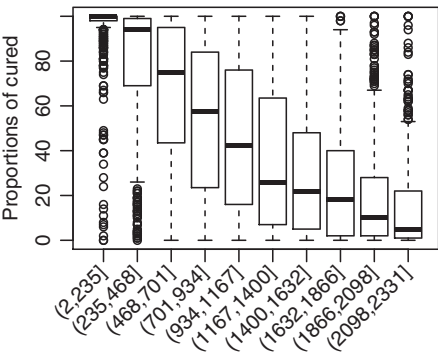

LF EC<sub>50</sub> concentration (ng/mL) deciles

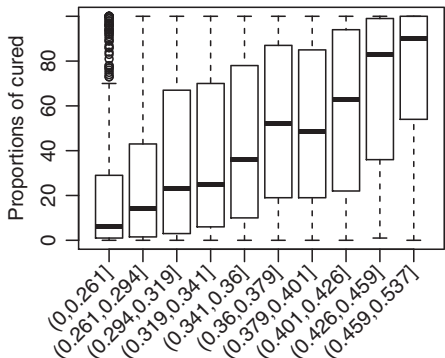

LF  $k_{max}$  deciles
